# Supplementary material for: Nucleolin Regulates the Expression of Kaposi’s Sarcoma-Associated Herpesvirus’ Latency-Associated Nuclear Antigen through G-Quadruplexes in the mRNA
Source: MDPI journal article supplement (doi:10.3390/v15122438), 2023-12-15
Supplement: s1 [file s1]

# LANA PQRSs with G-Scores

| <u>Position</u> | <u>Length</u> | <u>PQRSs</u>                          | <u>G-Score</u> |
|-----------------|---------------|---------------------------------------|----------------|
| 26              | 19            | <u>GGTCGGGACGGAGCACCGG</u>            | 17             |
| 915             | 18            | <u>GGCTGGCGAGGATAATGG</u>             | 18             |
| 987             | 20            | <u>GGATGATGAGGAGGAGCAGG</u>           | 15             |
| 1017            | 14            | <u>GGAGGACGAGGAGG</u>                 | 18             |
| 1038            | 17            | <u>GGAGGATGACGAGGAGG</u>              | 15             |
| 1065            | 23            | <u>GGATGACGAGGAGGATGACGAGG</u>        | 15             |
| 1110            | 17            | <u>GGAGGATGACGAGGAGG</u>              | 15             |
| 1134            | 17            | <u>GGAGGATGACGAGGAGG</u>              | 15             |
| 1158            | 20            | <u>GGAGGAGGACGAGGAGGAGG</u>           | 21             |
| 1182            | 20            | <u>GGAGGAGGACGAGGAGGAGG</u>           | 21             |
| 1227            | 29            | <u>GGACAATGAGGACGAGGAGGATGACGAGG</u>  | 21             |
| 1260            | 29            | <u>GGACAAGAAGGAGGACGAGGAGGACGGGG</u>  | 21             |
| 2091            | 29            | <u>GGATGAGCAGGAGCAGCAGGATGAGCAGG</u>  | 21             |
| 2268            | 29            | <u>GGAGGAGCAGGAGCAGCAGGAGGAGCAGG</u>  | 21             |
| 2316            | 23            | <u>GGAGCAGGAGTTAGAGGATCAGG</u>        | 18             |
| 2352            | 23            | <u>GGAGCAGGAGCAGGAGTTAGAGG</u>        | 18             |
| 2379            | 23            | <u>GGAGCAGGAGTTAGAGGAGCAGG</u>        | 18             |
| 2427            | 23            | <u>GGAGTTAGAGGAGCAGGAGCAGG</u>        | 18             |
| 2457            | 23            | <u>GGAGCAGGAGCAGGAGTTAGAGG</u>        | 18             |
| 2484            | 23            | <u>GGAGCAGGAGTTAGAGGAGCAGG</u>        | 18             |
| 2511            | 23            | <u>GGAGTTAGAGGAGCAGGAGGTGG</u>        | 18             |
| 2547            | 23            | <u>GGAGGTGGAAGAGCAAGAGCAGG</u>        | 9              |
| 2574            | 29            | <u>GGAAGAGCAGGAATTAGAGGAGGTGGAGG</u>  | 21             |
| 2619            | 29            | <u>GGAGGAGCAGGAGGAGCAGGAGTTAGAGG</u>  | 21             |
| 2652            | 29            | <u>GGAAGAGCAGGAAGAGCAGGAGTTAGAGG</u>  | 21             |
| 2685            | 29            | <u>GGAAGAGCAGGAAGAGCAGGAGTTAGAGG</u>  | 21             |
| 2718            | 29            | <u>GGAAGAGCAGGAGCAGCAGGAGTTAGAGG</u>  | 21             |
| 2760            | 26            | <u>GGAGCAGCAGGGGGTGGAAACAGCAGG</u>    | 18             |
| 2822            | 30            | <u>GGTCGTCATCCGAGGACGAAATGGAAGTGG</u> | 14             |
| 3232            | 17            | <u>GGAGGAGTAAAGGCAGG</u>              | 16             |
| 3445            | 20            | <u>GGGGAAAACCAAAGTCCTGG</u>           | 13             |

Supplemental Table 1: LANA PQRSs

Table shows LANA PQRSs with corresponding G-Scores from QGRSMapper.  
Overlapping PQRSs are excluded.
